# Supplementary material for: Bacillus subtilis Early Colonization of Arabidopsis thaliana Roots Involves Multiple Chemotaxis Receptors
Source: PubMed Central journal article supplement (PMC5137498; doi:10.1128/mbio.01664-16), 2016-11-29
Supplement: mbo006163083st1.pdf [file mbo006163083st1.pdf]

Table S1. Strains use in this study

| Strain   | Genotype                                                                                                            | Reference/source |
|----------|---------------------------------------------------------------------------------------------------------------------|------------------|
| NCIB3610 | <b>Wild type.</b> Undomesticated strain                                                                             | Kolter lab stock |
| HV1048   | <i>amyE::P<sub>hag</sub>-cfp</i> (spec)                                                                             | (1)              |
| DL821    | <i>lacA::P<sub>tapA</sub>-yfp</i> (erm)                                                                             | (2)              |
| PB293    | <i>amyE::P<sub>spac</sub>-cfp</i> (spec)                                                                            | This study       |
| HV1150   | <i>hag::tet</i>                                                                                                     | (1)              |
| PB371    | <i>motA::kan</i>                                                                                                    | This study       |
| RL2666   | <i>cheA::tet</i>                                                                                                    | (3)              |
| HV1235   | <i>eps::tet tasA::kan</i>                                                                                           | (4)              |
| PB408    | <i>mcpA::tet</i>                                                                                                    | This study       |
| PB409    | <i>mcpB::tet</i>                                                                                                    | This study       |
| PB410    | <i>tlpA::tet</i>                                                                                                    | This study       |
| PB411    | <i>tlpB::tet</i>                                                                                                    | This study       |
| PB418    | <i>mcpC::erm</i>                                                                                                    | This study       |
| PB451    | <i>tlpC::spc</i>                                                                                                    | This study       |
| PB455    | <i>mcpB::tet mcpC::mls tlpC::spc</i>                                                                                | This study       |
| PB486    | <i>yvaQ::cm</i>                                                                                                     | This study       |
| ZK4262   | <i>hemAT::erm</i>                                                                                                   | Roberto Kolter   |
| PB434    | <i>yfmS::kan</i>                                                                                                    | This study       |
| PB465    | <i>yoaH::kan</i>                                                                                                    | This study       |
| PB461    | <i>mcpB::tet mcpC::mls tlpC::spc hemAT::kan</i>                                                                     | This study       |
| OI1085   | <i>his- met- trp-</i> (OI WT)                                                                                       | (5)              |
| OI3545   | <i>(mcpA mcpB tlpA tlpB)101::cat mcpC4::erm tlpC::cat hemAT::erm yfmS::erm yoaH::erm yvaQ::erm</i> (OI $\Delta$ 10) | (5)              |

\*Unless indicated, strains are derivatives of *B. subtilis* 3610. Antibiotics: spectinomycin (spec), kanamycin (kan), erm (mls), chloramphenicol (cm), tetracycline (tet).

1. **Vlamakis H, Aguilar C, Losick R, Kolter R.** 2008. Control of cell fate by the formation of an architecturally complex bacterial community. *Genes Dev* **22**:945–53.
2. **López D, Vlamakis H, Losick R, Kolter R.** 2009. Paracrine signaling in a bacterium. *Genes Dev* **23**:1631–1638.
3. **Kearns DB, Losick R.** 2004. Swarming motility in undomesticated *Bacillus subtilis*. *Mol Microbiol* **49**:581–590.
4. **Aguilar C, Vlamakis H, Guzman A, Losick R, Kolter R.** 2010. KinD is a checkpoint protein linking spore formation to extracellular-matrix production in *Bacillus subtilis* biofilms. *MBio* **1**.

5. **Hou S, Larsen RW, Boudko D, Riley CW, Karatan E, Zimmer M, Ordal GW, Alam M.** 2000. Myoglobin-like aerotaxis transducers in Archaea and Bacteria. *Nature* **403**:540–4.
