# Supplementary material for: Bacillus subtilis Early Colonization of Arabidopsis thaliana Roots Involves Multiple Chemotaxis Receptors
Source: PubMed Central journal article supplement (PMC5137498; doi:10.1128/mbio.01664-16), 2016-11-29
Supplement: mbo006163083st2.pdf [file mbo006163083st2.pdf]

Table S2. Primers use in this study

| Primer name    | Sequence                                               |
|----------------|--------------------------------------------------------|
| motA_up_fwd    | 5'-ggagaactgaagaaacattggcgg                            |
| motA_up_rev    | 5'-cctatcacctcaaatggttcgctggacgctcaatgccacaaaagcaaga   |
| motA_down_fwd  | 5'-cgagcgcctacgaggaatttgatcggcagaacaaggagaggcgcaaaatg  |
| motA_down_rev  | 5'-cgcctctcggcaaaatgagaacttc                           |
| mcpA_up_fwd    | 5'-caagtggtgaaagggctgg                                 |
| mcpA_up_rev    | 5'-gagaacaacctgcaccattgcaaga gatcttgtttatgagttggag     |
| mcpA_down_fwd  | 5'-gggatcaactttgggagagagttc cgggatatgaccaaacgatt       |
| mcpA_down_rev  | 5'-agccttctttccgattttga                                |
| mcpB_up_fwd    | 5'-cggatcaaattcaggattctta                              |
| mcpB_up_rev    | 5'-gagaacaacctgcaccattgcaaga cttcagccaattgataaaagtc    |
| mcpB_down_fwd  | 5'-gggatcaactttgggagagagttc gcgcatatggcagaagagc        |
| mcpB_down_rev  | 5'-gacaattgtttgcctttattgg                              |
| tlpA_up_fwd    | 5'-caacggaatcgctgaccaaac                               |
| tlpA_up_rev    | 5'-gagaacaacctgcaccattgcaaga gatctgcaatagtggtgagt      |
| tlpA_down_fwd  | 5'-gggatcaactttgggagagagttc ctgacgcttgaagaatgtctg      |
| tlpA_down_rev  | 5'-ctgaacctctttgtctgctg                                |
| tlpB_up_fwd    | 5'-gttaaagaagcggagcaagtc                               |
| tlpB_up_rev    | 5'-gagaacaacctgcaccattgcaaga gctgtttgatccattgtatgaat   |
| tlpB_down_fwd  | 5'-gggatcaactttgggagagagttc gaagaactcaggacattacg       |
| tlpB_down_rev  | 5'-cattaatacaagctcggcgtg                               |
| tlpC_up_fwd    | 5'-agaagtgatccagcaaaagcctgac                           |
| tlpC_up_rev    | 5'-cttgataataagggttaactattgcctaagcatcacagtccaactgatgc  |
| tlpC_down_fwd  | 5'-gggtaactagcctcgccgggtccacgaggagcttaccggtatcataagcca |
| tlpC_down_rev  | 5'-tttcgctgtgcctcaaaggaaatgg                           |
| yvaQ_up_fwd    | 5'-atccgcaagcatctgaaggctatc                            |
| yvaQ_up_rev    | 5'-cttgataataagggttaactattgccaggctgaattgcggaatcgtc     |
| yvaQ_down_fwd  | 5'-gggtaactagcctcgccgggtccacgtgaagagcttgagcagctggccaat |
| yvaQ_down_rev  | 5'-gggaagagggtcaatgaacgtgcttg                          |
| yfmS_up_fwd    | 5'-gcgatcatctcattaccggttct                             |
| yfmS_up_rev    | 5'-cctatcacctcaaatggttcgctgtttggccggtatattcacgagcag    |
| yfmS_down_fwd  | 5'-cgagcgcctacgaggaatttgatcgttgcgaaaatggccgaaaaagcgt   |
| yfmS_down_rev  | 5'-gaaatatctatcgtgcgtcaccagc                           |
| yoaH_up_fwd    | 5'-catgtaatccggacttctccccatc                           |
| yoaH_up_rev    | 5'-cctatcacctcaaatggttcgctgcatgtgtcgtttcccttccgcac     |
| yoaH_down_fwd  | 5'-cgagcctacgaggaatttgatcgggaaatctcctatgccgcagaatc     |
| yoaH_down_rev  | 5'-gcatgaataacctgccaacagacag                           |
| hemAT_up_fwd   | 5'-tccaccaagatctagtacgatcg                             |
| hemAT_up_rev   | 5'-cctatcacctcaaatggttcgctgctcagcatctccaacctgaccatt    |
| hemAT_down_fwd | 5'-cgagcgcctacgaggaatttgatcggcgttgattcgtgtcatcctgac    |
| hemAT_down_rev | 5'-gggcgatgtttcggcagtagatgaa                           |
